# Supplementary material for: Integrative Analysis of TNFRSF18 in Immunogenomics: Implications as a Predictive Biomarker and Therapeutic Target in Precision Immunotherapy
Source: Research Square preprint supplement (doi:10.21203/rs.3.rs-8563606/v1), 2026-01-29
Supplement: Supplementary file 1 [file 6cb28c83df00aaab57286223.pdf]

# Integrative Analysis of TNFRSF18 in Immunogenomics: Implications as a Predictive Biomarker and Therapeutic Target in Precision Immunotherapy

Miao Sun <sup>1†</sup>, Mengmeng Zhang <sup>2†</sup>, Shuangshuang Duan <sup>1</sup>, Lijun Zhang <sup>1</sup>, Huibin Liu <sup>2\*</sup>

<sup>1</sup>College of Pharmacy, Xinjiang Medical University, Urumqi 830011, China, <sup>2</sup>Clinical Trial Office, Cancer Hospital of Xinjiang Medical University, Urumqi 830011, China

<sup>†</sup>These authors contributed equally to this work.

\*Corresponding author's e-mail: liuhuibinedu@163.com.

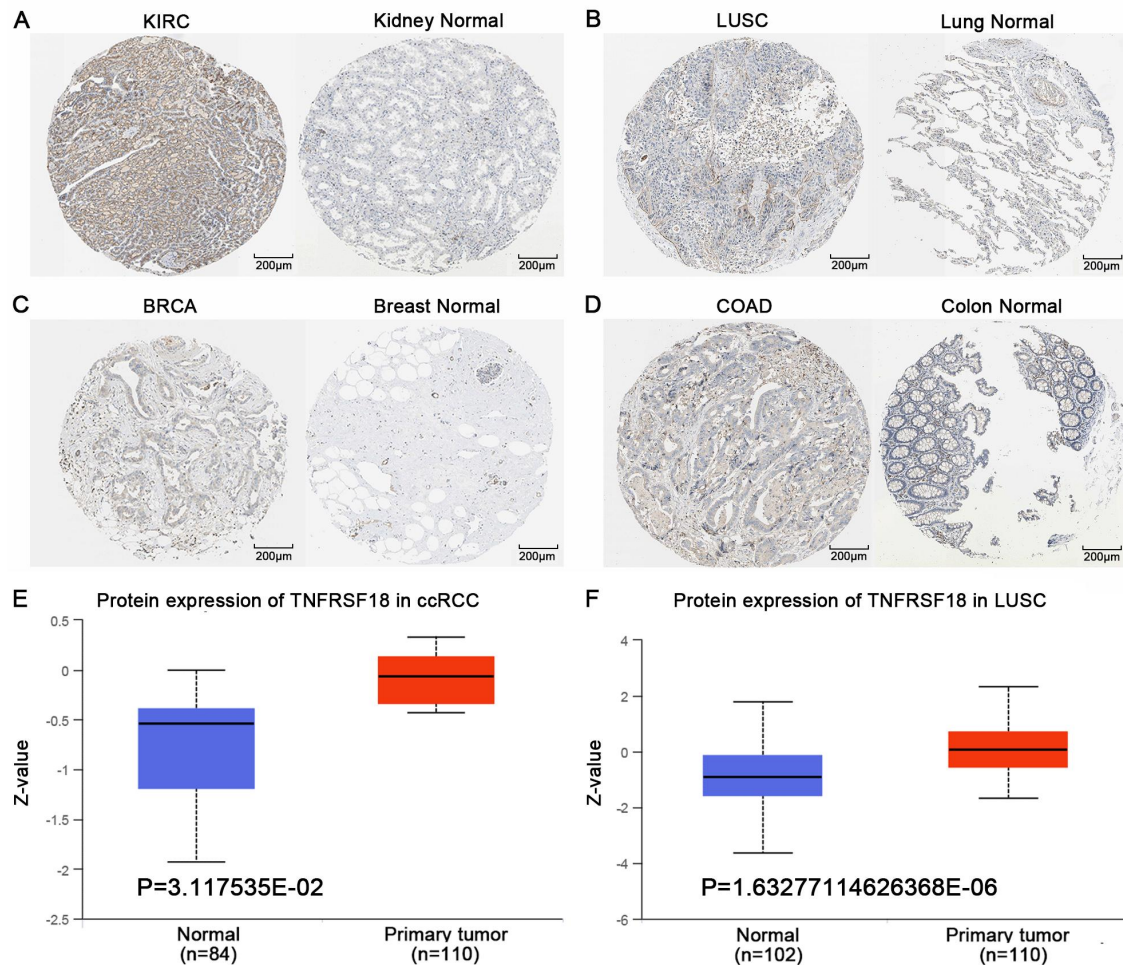

**Fig. S1. Differential protein expression of TNFRSF18 in tumor versus normal tissues.** Representative IHC staining of TNFRSF18 in paired clinical specimens: (A) kidney, (B) lung, (C) breast, and (D) colon (scale bars: 200  $\mu$ m). (E-F) Bioinformatics validation of pan-cancer TNFRSF18 protein expression patterns using the UALCAN database.

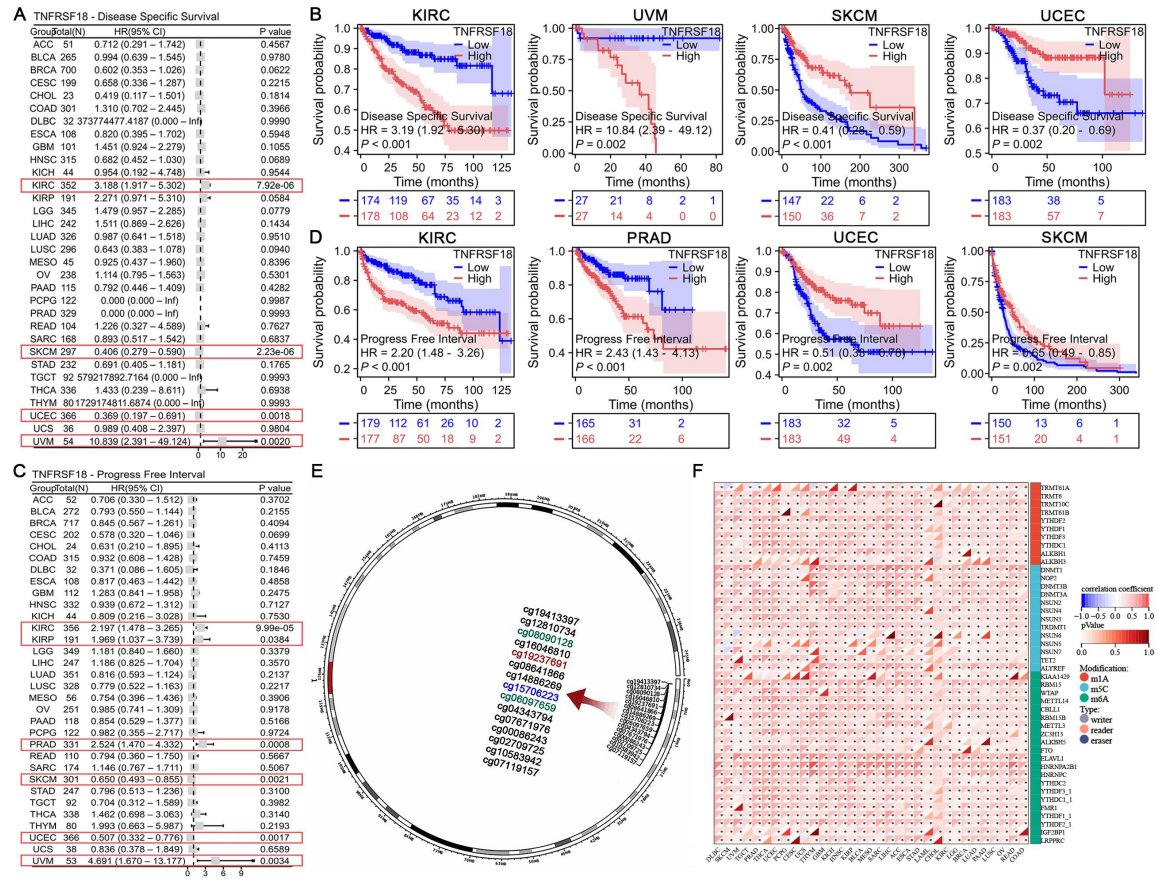

**Fig. S2. Prognostic and epigenetic associations of TNFRSF18 across cancer types.** (A) Univariate Cox analysis of TNFRSF18 association with disease-specific survival (DSS). (B) Kaplan-Meier curves for disease-specific survival (DSS) stratified by TNFRSF18 expression in KIRC, UVM, SKCM, UCEC and PCPG. (C) Univariate Cox analysis of TNFRSF18 association with progression-free interval (PFI). (D) Kaplan-Meier curves for PFI in KIRC, PRAD, UVM, KIRP, UCEC and SKCM. (E) Chromosomal distribution of the methylation probes associated with TNFRSF18. (F) The correlation between TNFRSF18 expression and m1A, m5C, m6A regulatory genes. \*  $P < 0.05$ .



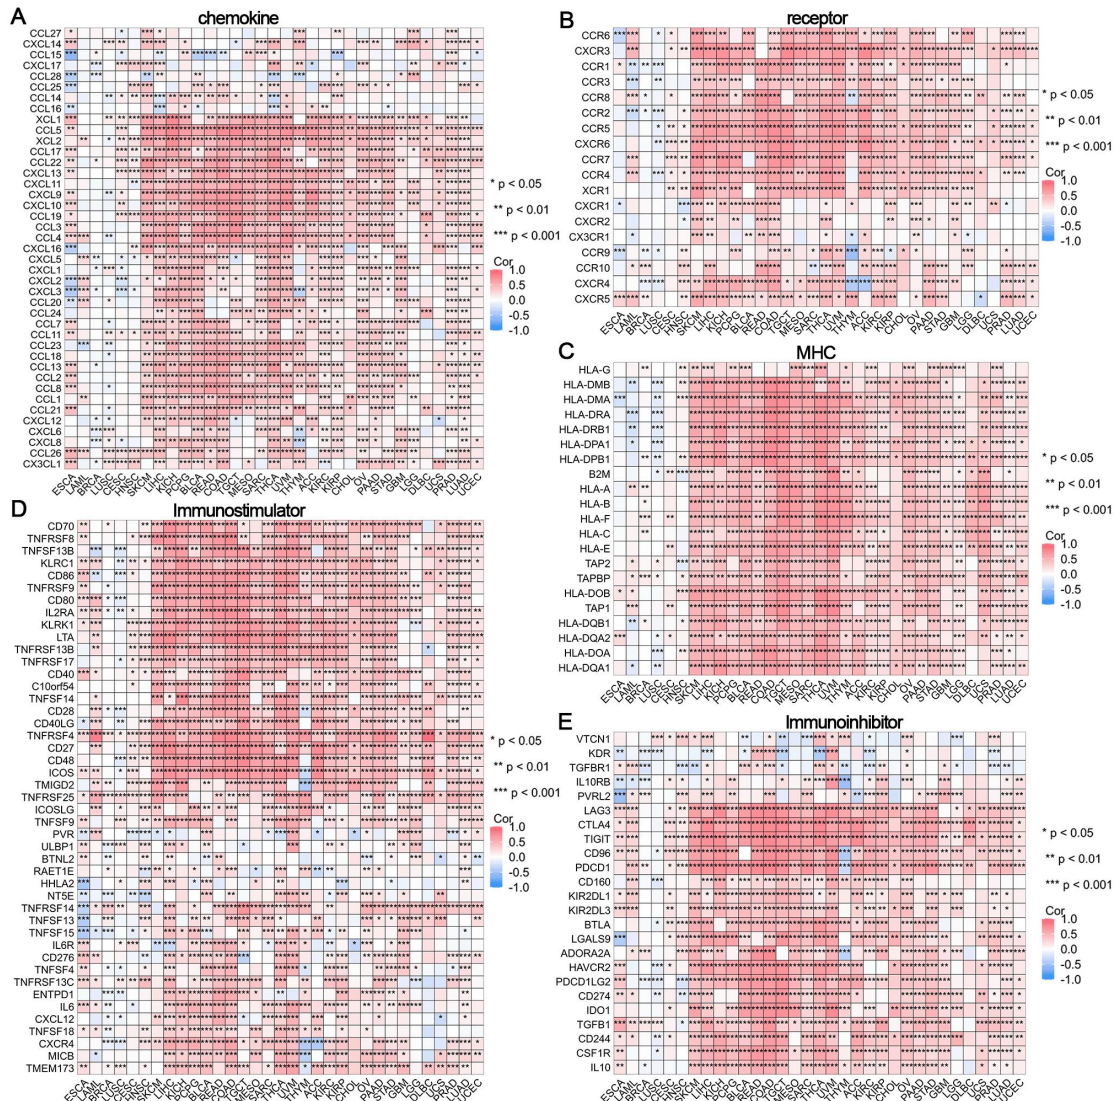

**Fig. S3. Pan-cancer correlation analysis of TNFRSF18 with immune modulatory genes.** Expression levels of TNFRSF18 were analyzed for significant correlations (Spearman's  $r$ ) with five categories of immune-related genes across multiple cancer types: (A) Chemokine, (B) Immune stimulators, (C) Chemokine receptors, (D) MHC molecules, and (E) Immune inhibitors.

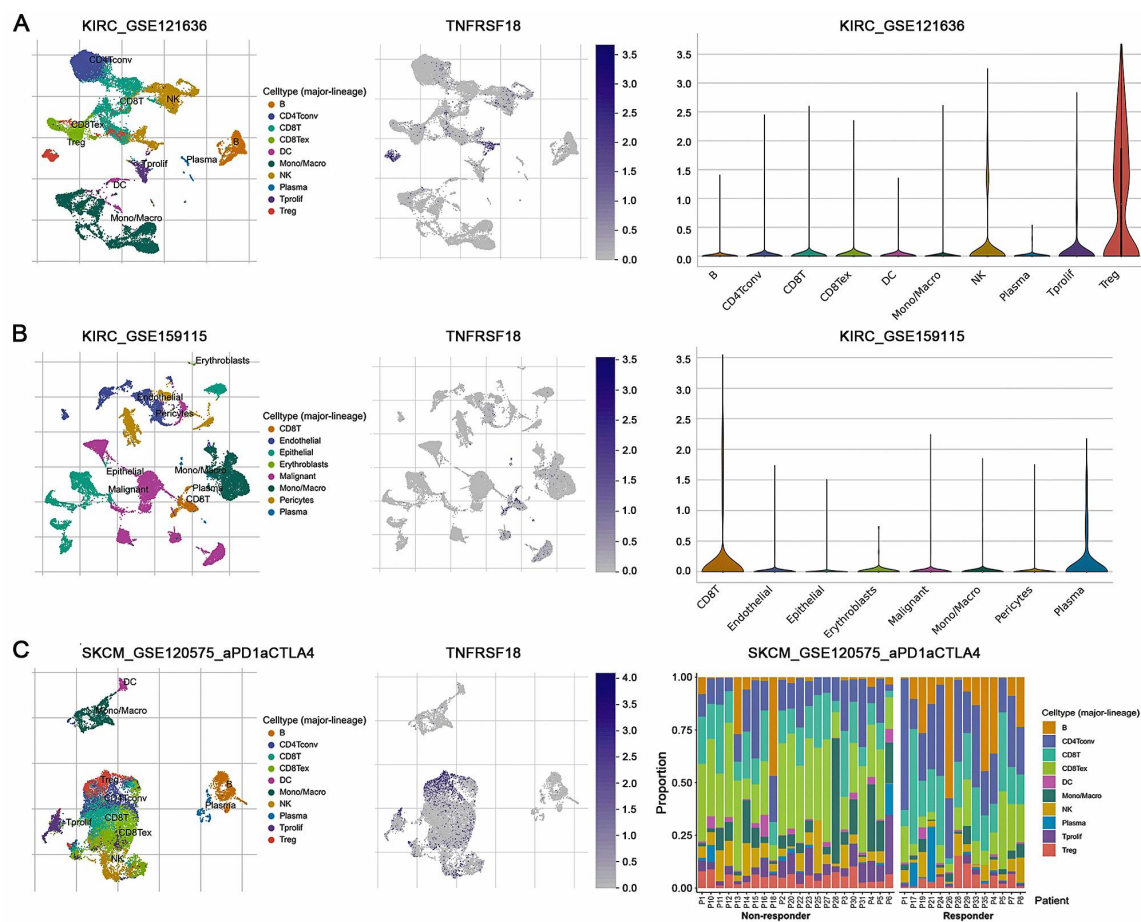

**Fig. S4. Single-cell TNFRSF18 expression profiles.** (A-B) Single-cell transcriptional profiles of TNFRSF18 across distinct KIRC cohorts (GSE121636 and GSE159115). (C) Comparative single-cell expression patterns of TNFRSF18 between immunotherapy responders and non-responders.

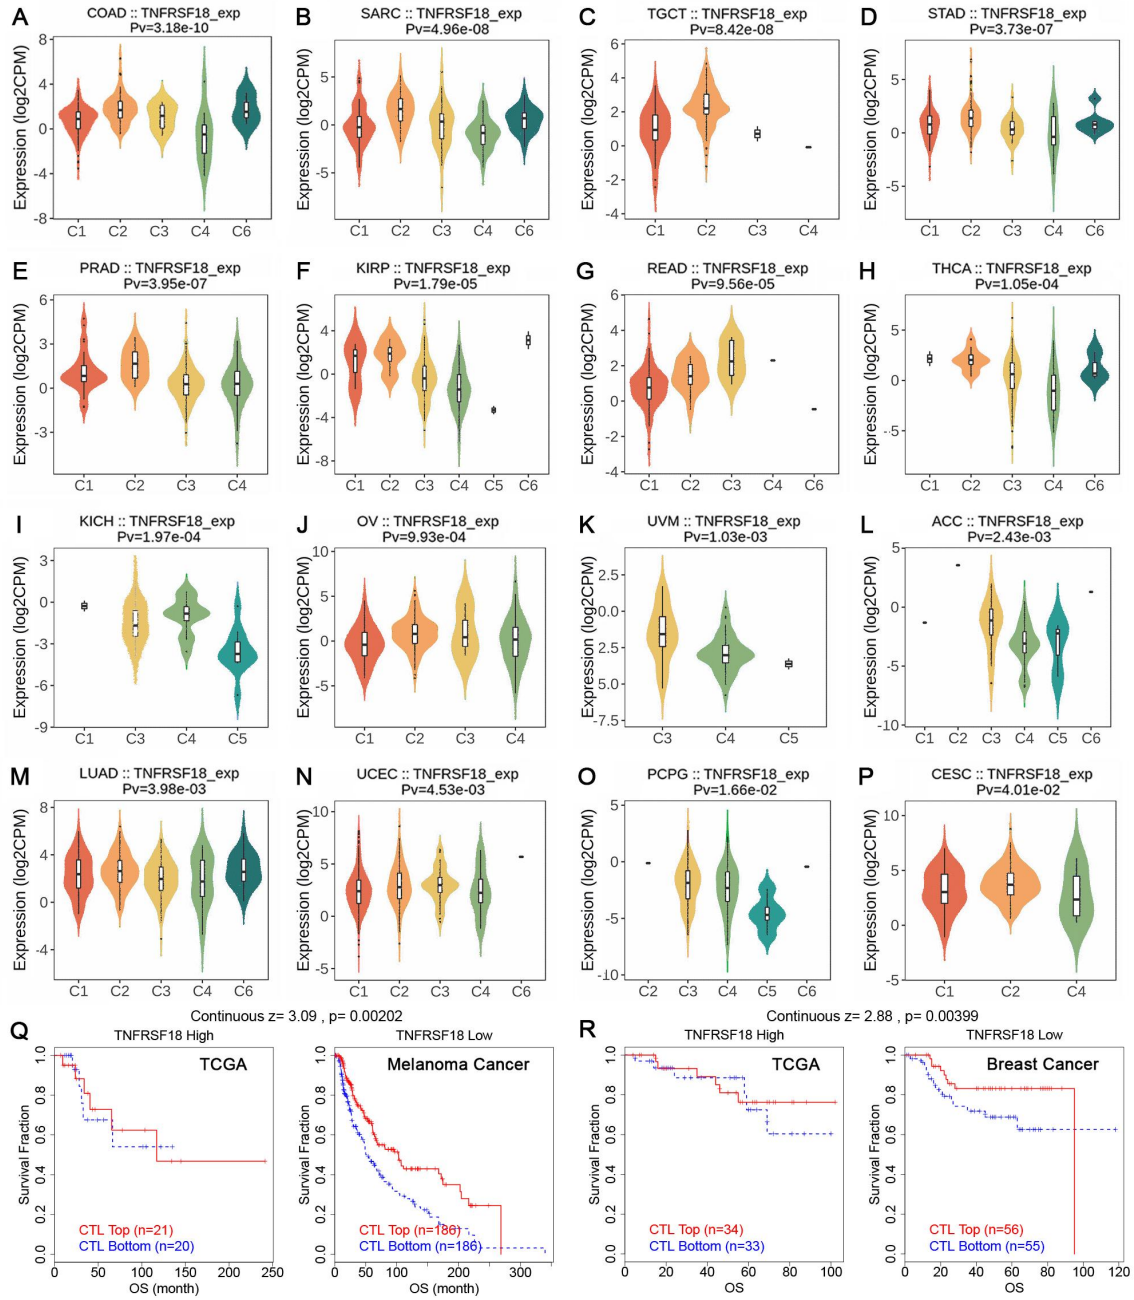

**Fig. S5. Pan-cancer analysis of TNFRSF18 expression across immune subtypes and CTL.** TNFRSF18 expression levels among six consensus molecular immune subtypes (C1: wound healing; C2: IFN- $\gamma$  dominant; C3: inflammatory; C4: lymphocyte depleted; C5: immunologically quiet; C6: TGF- $\beta$  dominant) in multiple cancer types: (A) COAD, (B) SARC, (C) TGCT, (D) STAD, (E) PEAD, (F) KIRP, (G) READ, (H) THCA, (I) KICH, (J) OV, (K) UVM, (L) ACC, (M) LUAD, (N) UCEC, (O) PCPG, and (P) CESC. (Q-R) Kaplan-Meier survival curves stratified by combined TNFRSF18 expression (high/low) and cytotoxic T lymphocyte (CTL) infiltration levels.

**Abbreviations:**

|                                                                  |      |
|------------------------------------------------------------------|------|
| Adrenocortical carcinoma                                         | ACC  |
| Bladder urothelial carcinoma                                     | BLCA |
| Breast invasive carcinoma                                        | BRCA |
| Cervical squamous cell carcinoma and endocervical adenocarcinoma | CESC |
| Cholangiocarcinoma                                               | CHOL |
| Colon adenocarcinoma                                             | COAD |
| Rectum adenocarcinoma                                            | READ |
| Lymphoid neoplasm diffuse large B-cell lymphoma                  | DLBC |
| Disease-specific survival                                        | DSS  |
| Esophageal carcinoma                                             | ESCA |
| Glioblastoma multiforme                                          | GBM  |
| Multiplex Immunohistochemistry                                   | mIHC |
| Head and neck squamous cell carcinoma                            | HNSC |
| Kyoto encyclopedia of genes and genomes                          | KEGG |
| Kidney chromophobe                                               | KICH |
| Kidney renal clear cell carcinoma                                | KIRC |
| Kidney renal papillary cell carcinoma                            | KIRP |
| Acute myeloid leukemia                                           | LAML |
| Brain lower-grade glioma                                         | LGG  |
| Liver hepatocellular carcinoma                                   | LIHC |
| Lung adenocarcinoma                                              | LUAD |
| Lung squamous cell carcinoma                                     | LUSC |
| Mesothelioma                                                     | MESO |
| major histocompatibility complex                                 | MHC  |

|                                                         |          |
|---------------------------------------------------------|----------|
| Microsatellite instability                              | MSI      |
| Overall survival                                        | OS       |
| Pancreatic adenocarcinoma                               | PAAD     |
| Pheochromocytoma and paraganglioma                      | PCPG     |
| Progression-free interval                               | PFI      |
| Protein-protein interaction                             | PPI      |
| Prostate adenocarcinoma                                 | PRAD     |
| Sarcoma                                                 | SARC     |
| Skin cutaneous melanoma                                 | SKCM     |
| Stomach adenocarcinoma                                  | STAD     |
| Testicular germ cell tumors                             | TGCT     |
| Thyroid carcinoma                                       | THCA     |
| Thymoma                                                 | THYM     |
| Tumor mutational burden                                 | TMB      |
| Tumor microenvironment                                  | TME      |
| Tumor Necrosis Factor Receptor Superfamily<br>Member 18 | TNFRSF18 |
| Regulatory T cells                                      | Tregs    |
| Uterine corpus endometrial carcinoma                    | UCEC     |
| Uterine carcinosarcoma                                  | UCS      |
| Uveal melanoma                                          | UVM      |
